# Supplementary material for: Technical note: Image processing for continuous river turbidity monitoring – full scale tests and potential applications
Source: Copernicus journal article supplement (doi:10.5194/egusphere-2024-2172), 2024-09-06
Supplement: Supplementary file [file egusphere-2024-2172-RC2-supplement.pdf]

Title: Image processing for continuous river turbidity monitoring - full scale tests and potential applications

The paper is well written but need following questions to be answered.

1. You should mention more numerical results in your abstract.  
The Introduction section is quite dense with information. So it makes harder to the reader to get the key points. Consider simplifying the language and structure to improve readability.
  2. Please ensure that the main objectives and contributions of the study are clearly stated.
  3. Consider adding more detailed literature review could strengthen the justification for the study.
  4. Clearly outline what specific research questions the study aims to answer and how the findings will contribute to existing knowledge in the field.
  5. In the Methodology section, consider adding a brief summary at the beginning of the section that outlines how each method contributes to the overall goal of estimating turbidity.
  6. Ensure consistency in the use of terminology throughout the section.
  7. Discuss any limitations or uncertainties in the results.
  8. Consider discussing the implications of the findings in terms of MONITORING.
  9. Summarize the key findings and their implications in a concise manner.
  10. In conclusion, provide a brief overview of the main objectives and methodology of the study before diving into the conclusions.
  11. Based on the findings, suggest recommendations for future research or practical applications.
-
